# Supplementary material
Source: publisher figshare collection journal article supplement (https://tandf.figshare.com/articles/dataset/_/21603033)

(A)

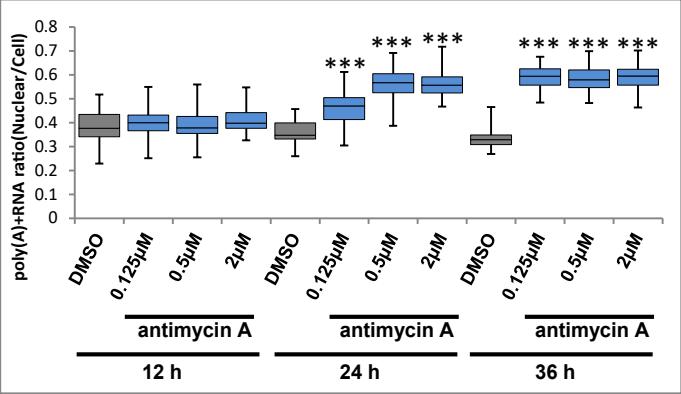

(B)

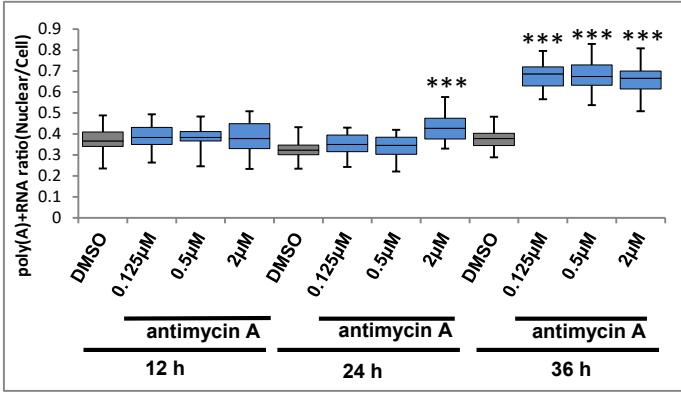

(C)

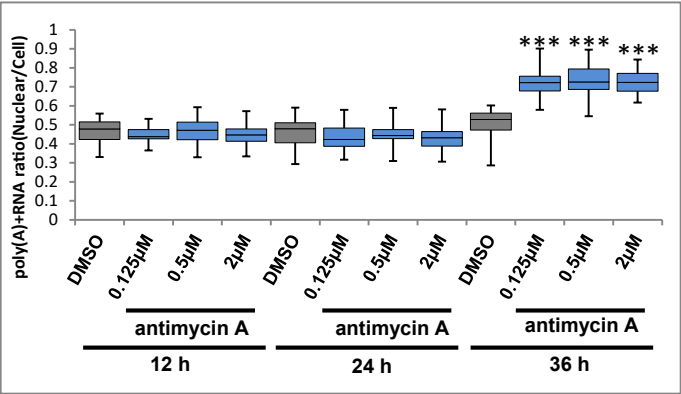

Supplement: Supplementary file 1 [file 3]

(A)

+VE822

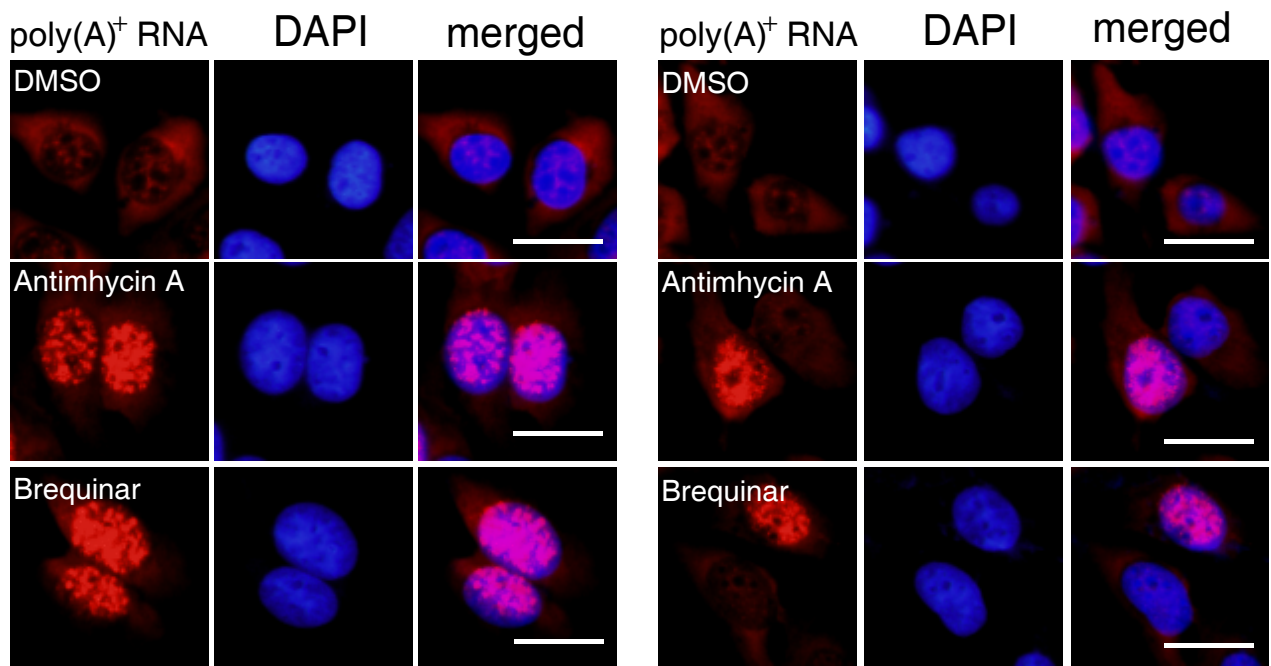

(B)

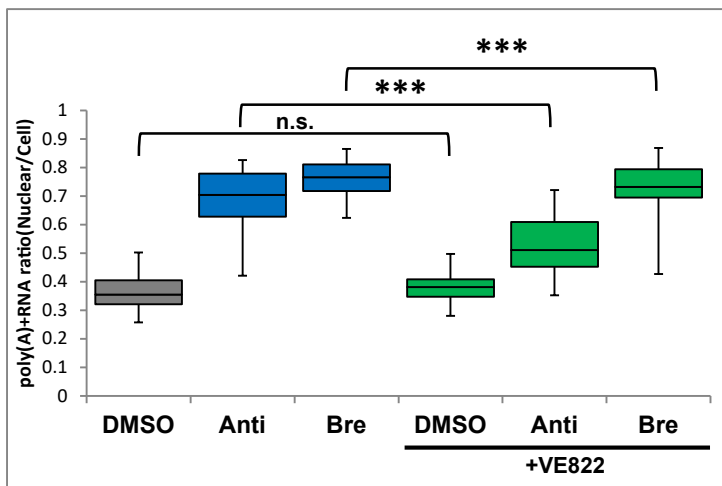

Supplement: Supplementary file 2 [file 3]
